# Supplementary material for: Pineapple by-products as a source of bioactive compounds with potential for industrial food application
Source: Royal Society of Chemistry journal article supplement (doi:10.1039/d2fo00657j), 2022-01-01
Supplement: d2fo00657j1.pdf [file d2fo00657j1.pdf]

**1 Pineapple by-products as a source of bioactive compounds with  
2 potential for industrial food application**

3

4 Bruna Moreira<sup>1</sup>, Eliana Pereira<sup>1</sup>, Tiane C. Finimundy<sup>1</sup>, José Pinela<sup>1</sup>, Ricardo C.  
5 Calhelha<sup>1</sup>, Márcio Carochó<sup>1</sup>, Dejan Stojković<sup>2</sup>, Marina Sokovic<sup>2</sup>, Isabel C.F.R. Ferreira<sup>1</sup>,  
6 Cristina Caleja<sup>1\*</sup>, Lillian Barros<sup>1\*</sup>

7

**8 Tables and Figures**

## Tables

**Table 1:** Retention time (Rt), wavelengths of maximum absorption in the visible region ( $\lambda_{\max}$ ), mass spectral data, and identification and quantification of phenolic compounds in pineapple peel and crown extracts.

| Peak | Rt<br>(min) | $\lambda_{\max}$<br>(nm) | [M-H] <sup>-</sup><br>(m/z) | MS <sup>2</sup><br>(m/z)                                       | Identification                                                                                  | Content (mg/g extract) |               |
|------|-------------|--------------------------|-----------------------------|----------------------------------------------------------------|-------------------------------------------------------------------------------------------------|------------------------|---------------|
|      |             |                          |                             |                                                                |                                                                                                 | Peel extract           | Crown extract |
| 1    | 4.48        | 275                      | 341                         | 179(100)                                                       | Caffeic acid- <i>O</i> -hexoside <sup>1</sup>                                                   | 0.0009±0.0001          | nd            |
| 2    | 4.93        | 275                      | 341                         | 179(100)                                                       | Caffeic acid- <i>O</i> -hexoside <sup>1</sup>                                                   | 0.0034±0.0002          | nd            |
| 3    | 5.30        | 277                      | 341                         | 179(100)                                                       | Caffeic acid- <i>O</i> -hexoside <sup>1</sup>                                                   | 0.0294±0.0002          | nd            |
| 4    | 5.90        | 292                      | 451                         | 253(100), 179(3), 161(20), 135(11)                             | Dicaffeoylglycerol <sup>1</sup>                                                                 | nd                     | 0.011±0.001   |
| 5    | 6.79        | 277                      | 341                         | 179(100)                                                       | Caffeic acid- <i>O</i> -hexoside <sup>1</sup>                                                   | 0.006±0.0002           | nd            |
| 6    | 6.86        | 321                      | 517                         | 473(100), 269(18)                                              | Apigenin-malonyl-hexoside <sup>2</sup>                                                          | nd                     | 1.1±0.1       |
| 7    | 7.86        | 326                      | 385                         | 209(8), 191(100), 147(5), 129(11)                              | Feruloyl aldarate <sup>3</sup>                                                                  | nd                     | 0.035±0.001   |
| 8    | 8.03        | 332                      | 461                         | 347(100), 299(25)                                              | Diosmetin 8- <i>C</i> -glucoside <sup>4</sup>                                                   | 0.1175±0.0002          | nd            |
| 9    | 8.45        | 328                      | 593                         | 473(100)                                                       | Apigenin 6,8- <i>C</i> -diglucoside <sup>5</sup>                                                | 0.46±0.01              | 0.56±0.01     |
| 11   | 9.29        | 274, 332                 | 597                         | 359(17), 295(20), 197(62), 179(56), 135(95)                    | Yunnaneic acid F <sup>6</sup>                                                                   | 0.41±0.005             | nd            |
| 12   | 10.15       | 275, 327                 | 399                         | 253(100), 235(23), 163(17), 145(9)                             | <i>p</i> -Coumaroyl-caffeoylglycerol <sup>7</sup>                                               | 0.25±0.01              | nd            |
| 13   | 10.70       | 326                      | 385                         | 209(6), 191(100), 147(7), 129(15)                              | Feruloyl aldarate <sup>3</sup>                                                                  | nd                     | 0.031±0.001   |
| 14   | 12.19       | 324                      | 593                         | 431(100)                                                       | Apigenin 6,8- <i>C</i> -diglucoside <sup>5</sup>                                                | nd                     | 0.483±0.005   |
| 15   | 13.05       | 365                      | 771                         | 609(95), 301(32), 179(12)                                      | 3,5-di- <i>O</i> -Caffeoyl-4- <i>O</i> -(3-hydroxy, 3-methyl) glutaroylquinic acid <sup>7</sup> | 0.18±0.01              | nd            |
| 16   | 13.05       | 315                      | 757                         | 595(21), 449(46), 287(90)                                      | Eriodictyol-4'- <i>O</i> -neohesperidoside-7- <i>O</i> -glucoside <sup>8</sup>                  | nd                     | 0.058±0.003   |
| 17   | 13.29       | 277, 301                 | 337                         | 191(85), 173(100), 155(4)                                      | <i>p</i> -Coumaroylisocitrate <sup>7</sup>                                                      | 0.132±0.005            | nd            |
| 18   | 14.06       | 225, 277                 | 305                         | 261(12), 221(47), 219(56), 179(100), 165(28), 137(30), 125(40) | (Epi)gallocatechin <sup>9</sup>                                                                 | 0.59±0.02              | nd            |
| 19   | 14.40       | 315                      | 537                         | 491(72), 329(100), 209(2), 167(24), 152(4)                     | Vanilloyl dihexoside <sup>10</sup>                                                              | 0.118±0.001            | nd            |
| 20   | 14.63       | 322                      | 563                         | 473(100), 443(69), 383(22), 353(28)                            | Apigenin-6- <i>C</i> -hexoside-8- <i>C</i> -pentoside <sup>5</sup>                              | nd                     | 0.462±0.002   |
| 21   | 15.42       | 225, 274                 | 441                         | 249(100)                                                       | N-L- $\gamma$ -Glutamyl-S-sinapyl-L-cysteine <sup>11</sup>                                      | 0.17±0.02              | nd            |
| 22   | 15.60       | 327                      | 537                         | 375 (100)                                                      | Anaflavoside B <sup>12</sup>                                                                    | nd                     | 0.468±0.001   |
| 23   | 16.51       | 350                      | 609                         | 301(100)                                                       | Quercetin-3- <i>O</i> -rutinoside <sup>12</sup>                                                 | nd                     | 0.471±0.001   |
| 24   | 17.09       | 327                      | 533                         | 311(100)                                                       | Apigenin-di- <i>C</i> -pentoside <sup>5</sup>                                                   | nd                     | 0.467±0.002   |

25 20.55 327 623 315(100)

Isorhametin rhamosyl-hexoside<sup>12</sup> nd 0.469±0.001

---

**Σ Phenolic compounds** 2.48±0.03 4.7±0.1

---

Calibration curves used in the quantification: 1. caffeic acid ( $y = 388345x + 406369$ ;  $R^2 = 0.994$ ; LOD = 0.78 µg/mL; LOQ = 1.97 µg/mL); 2. apigenin-7-*O*-glucoside ( $y = 10683x - 45794$ ;  $R^2 = 0.999$ ; LOD = 0.10 µg/mL; LOQ = 0.53 µg/mL); 3. ferulic acid ( $y = 633,126x - 185,462$ ;  $R^2 = 0.999$ ; LOD = 0.20 µg/mL; LOQ = 1.01 µg/mL); 4. taxifolin ( $y = 478.06x + 657.33$ ;  $R^2 = 0.999$ ; LOD = 0.67 µg/mL; LOQ = 2.01 µg/mL); 5. apigenin 6-*C*-glucoside ( $y = 107025x - 61531$ ;  $R^2 = 0.9989$ ; LOD = 0.19 µg/mL; LOQ = 0.63 µg/mL); 6. rosmarinic acid ( $y = 191291x - 652903$ ;  $R^2 = 0.999$ ; LOD = 0.15 µg/mL; LOQ = 0.68 µg/mL); 7. chlorogenic acid ( $y = 168823x - 161172$ ;  $R^2 = 0.9999$ ; LOD = 0.20 µg/mL; LOQ = 0.68 µg/mL); 8. naringenin ( $y = 18433x + 78903$ ;  $R^2 = 0.9998$ ; LOD = 0.20 µg/mL; LOQ = 0.64 µg/mL); 9. epicatechin ( $y = 10314x + 147331$ ;  $R^2 = 0.9994$ ; LOD = 0.15 µg/mL; LOQ = 0.78 µg/mL); 10. vanillic acid ( $y = 197,337x + 30036$ ;  $R^2 = 0.999$ ; LOD = 0.17 µg/mL; LOQ = 1.22 µg/mL); 11. sinapic acid ( $y = 197,337x + 30036$ ;  $R^2 = 0.999$ ; LOD = 0.17 µg/mL; LOQ = 1.22 µg/mL); 12. quercetin-3-*O*-glucoside ( $y = 34843x - 160173$ ;  $R^2 = 0.9998$ ; LOD = 0.21 µg/mL; LOQ = 0.71 µg/mL). nd: not detected.

**Table 2:** Antioxidant and cytotoxic activities of pineapple peel and leaf crown extracts.

|                                                      | Peel extract | Crown extract | Positive control |
|------------------------------------------------------|--------------|---------------|------------------|
| <b>Antioxidant activity (IC<sub>50</sub>, µg/mL)</b> |              |               | Trolox           |
| TBARS formation inhibition                           | 4.3±0.1*     | 6.6±0.3       | 5.4±0.3          |
| OxHLIA                                               | Δt 60 min    | 190±7*        | 395±19           |
|                                                      | Δt 120 min   | 333±9*        | 714±33           |
| <b>Cytotoxic activity (GI<sub>50</sub>, µg/mL)</b>   |              |               | Ellipticine      |
| Tumour cell lines                                    | AGS          | >400          | >400             |
|                                                      | CaCo-2       | 378±7*        | >400             |
|                                                      | MCF-7        | 322±3*        | >400             |
|                                                      | NCI-H460     | >400          | >400             |
| Non-tumour cell line                                 | VERO         | >400          | >400             |

GI<sub>50</sub> values correspond to the concentration that causes 50% inhibition of cell proliferation; AGS - human gastric adenocarcinoma; CaCo-2 - human colon adenocarcinoma MCF-7 - human breast adenocarcinoma; NCI-H460 - human lung carcinoma. An \* in each line corresponds to a significant statistical difference with a *p*-value of 0.05 using a Student's T test.

**Table 3:** Antimicrobial activity of pineapple peel and crown extracts against foodborne bacterial and fungal strains.

| <b>Antibacterial</b>      | <b>Peel extract</b> |      | <b>Crown extract</b> |      | <b>E211</b> |      | <b>E224</b> |      |
|---------------------------|---------------------|------|----------------------|------|-------------|------|-------------|------|
|                           | MIC                 | MBC  | MIC                  | MBC  | MIC         | MBC  | MIC         | MBC  |
| <i>S. aureus</i>          | 1.00                | 2.00 | 1.00                 | 1.00 | 4.00        | 4.00 | 1.00        | 1.00 |
| <i>B. cereus</i>          | 1.00                | 2.00 | 1.00                 | 2.00 | 0.50        | 0.50 | 2.00        | 4.00 |
| <i>L. monocytogenes</i>   | 2.00                | 2.00 | 2.00                 | 4.00 | 1.00        | 2.00 | 0.50        | 1.00 |
| <i>E. coli</i>            | 0.50                | 1.00 | 0.50                 | 1.00 | 1.00        | 2.00 | 0.50        | 1.00 |
| <i>S. Typhimurium</i>     | 1.00                | 2.00 | 1.00                 | 2.00 | 1.00        | 2.00 | 1.00        | 1.00 |
| <i>E. cloacae</i>         | 1.00                | 1.00 | 1.00                 | 1.00 | 2.00        | 4.00 | 0.50        | 0.50 |
| <b>Antifungal</b>         | MIC                 | MFC  | MIC                  | MFC  | MIC         | MFC  | MIC         | MFC  |
| <i>A. fumigatus</i>       | 0.50                | 1.00 | 0.50                 | 0.50 | 1.00        | 2.00 | 1.00        | 1.00 |
| <i>A. niger</i>           | 0.25                | 0.50 | 0.25                 | 0.50 | 1.00        | 2.00 | 1.00        | 1.00 |
| <i>A. versicolor</i>      | 1.00                | 2.00 | 0.50                 | 1.00 | 2.00        | 2.00 | 1.00        | 1.00 |
| <i>P. funiculosum</i>     | 0.25                | 0.50 | 0.25                 | 0.50 | 1.00        | 2.00 | 0.50        | 0.50 |
| <i>P. aurantiogriseum</i> | 2.00                | 4.00 | 1.00                 | 2.00 | 2.00        | 4.00 | 1.00        | 1.00 |
| <i>T. viride</i>          | 0.25                | 0.50 | 0.25                 | 0.50 | 1.00        | 2.00 | 0.50        | 0.50 |

MIC: Minimum inhibitory concentration; MIC: Minimum inhibitory concentration (mg/mL); MBC: Minimum bactericidal concentration (mg/mL); MFC: Minimum fungicidal concentration (mg/mL). Sodium sulphite (E221) and potassium metabisulphite (E224) were used as positive controls.

**Table 4:** Nutritional composition, colour parameters, and antioxidant activity of control and pineapple peel extract functionalized “súplicas”. The effects of extract incorporation (I) and storage time (ST) on these quality parameters are demonstrated.

|                                            | Incorporation (I) |                | Student's t-test        | Storage time (ST) |                   |                   | Tukey's test             | ST × I                   |
|--------------------------------------------|-------------------|----------------|-------------------------|-------------------|-------------------|-------------------|--------------------------|--------------------------|
|                                            | Control           | Functionalized | <i>p</i> -Value (n = 9) | 0 Days            | 3 Days            | 7 Days            | <i>p</i> -Value (n = 18) | <i>p</i> -Value (n = 27) |
| Moisture (g/100 g fw)                      | 6.5±0.2*          | 7.4±0.2        | <0.001                  | 7.0±0.2           | 6.9±0.5           | 7.0±0.7           | 0.089                    | 0.154                    |
| Fat (g/100 g fw)                           | 4.13±0.06         | 3.56±0.04      | <0.001                  | 3.8±0.3           | 3.9±0.3           | 3.8±0.3           | 0.004                    | 0.029                    |
| Proteins (g/100 g fw)                      | 7.80±0.07*        | 7.90±0.01      | 0.005                   | 7.92±0.07         | 8.0±0.1           | 7.92±0.07         | 0.050                    | 0.152                    |
| Ash (g/100 g fw)                           | 0.34±0.01         | 0.36±0.01      | <0.001                  | 0.37±0.01         | 0.35±0.01         | 0.35±0.01         | <0.001                   | <0.001                   |
| Carbohydrates (g/100 g fw)                 | 80.9±0.2          | 80.7±0.2       | <0.001                  | 80.8±0.1          | 80.8±0.3          | 80.8±0.4          | 0.897                    | <0.001                   |
| Energy (kcal)                              | 393±1             | 386±1          | <0.001                  | 389±2             | 390±3             | 390±4             | <0.001                   | <0.001                   |
| Energy (kJ)                                | 1645±4            | 1618±4         | <0.001                  | 1630±9            | 1633±14           | 1631±19           | <0.001                   | <0.001                   |
| Sucrose (g/100 g fw)                       | 86±13             | 85±3           | 0.708                   | 91±2 <sup>b</sup> | 82±3 <sup>a</sup> | 82±3 <sup>a</sup> | 0.003                    | 0.102                    |
| C16:0 (relative %)                         | 20±2              | 23.6±0.4       | <0.001                  | 22±2              | 21±3              | 22.7±0.6          | <0.001                   | <0.001                   |
| C16:1 (relative %)                         | 2.5±0.2           | 2.96±0.08      | <0.001                  | 2.7±0.3           | 2.6±0.3           | 2.8±0.2           | <0.001                   | <0.001                   |
| C18:1t (relative %)                        | 5.8±0.3           | 6.3±0.1        | <0.001                  | 6.0±0.2           | 5.9±0.6           | 6.22±0.08         | <0.001                   | <0.001                   |
| C18:1c (relative %)                        | 49±3              | 44.0±0.7       | <0.001                  | 46±3              | 48±4              | 45.5±0.9          | <0.001                   | <0.001                   |
| C18:2 (relative %)                         | 19.3±0.5          | 20.0±0.2       | <0.001                  | 19.8±0.4          | 19.4±0.8          | 19.8±0.2          | <0.001                   | <0.001                   |
| SFA (relative %)                           | 21±2              | 24.0±0.4       | <0.001                  | 22±2              | 21±3              | 23.1±0.7          | <0.001                   | <0.001                   |
| MUFA (relative %)                          | 58±2              | 53.5±0.7       | <0.001                  | 55±2              | 57±4              | 54.8±0.7          | <0.001                   | <0.001                   |
| PUFA (relative %)                          | 21.3±0.8          | 22.4±0.3       | <0.001                  | 22.0±0.6          | 21±1              | 22.1±0.2          | <0.001                   | <0.001                   |
| <i>L</i> * (lightness)                     | 80.4±0.5          | 80.9±0.6       | <0.001                  | 80.9±0.6          | 80.2±0.6          | 80.7±0.3          | <0.001                   | 0.009                    |
| <i>a</i> * (redness)                       | 1.4±0.2           | 1.5±0.2        | 0.196                   | 1.4±0.1           | 1.4±0.1           | 1.6±0.2           | <0.001                   | 0.040                    |
| <i>b</i> * (yellowness)                    | 32±1              | 31.7±0.5       | <0.001                  | 32.5±0.9          | 32.4±0.7          | 31.0±0.5          | <0.001                   | <0.001                   |
| DPPH scavenging (EC <sub>50</sub> , mg/mL) | >400*             | 134±53         | <0.001                  | 237±173           | 278±125           | 292±111           | <0.001                   | 0.101                    |
| Reducing power (EC <sub>50</sub> , mg/mL)  | 17±2              | 20±4           | <0.001                  | 17±2              | 19±4              | 20±4              | <0.001                   | <0.001                   |

In each row, for I and ST, an asterisk (\*) or different letters mean significant statistical differences (*p*-value < 0.05) between samples, respectively. The presented standard deviations were calculated from results obtained under different operational conditions. Therefore, these values should not be regarded as a measure of precision, rather as the range of the recorded values.

# Figure

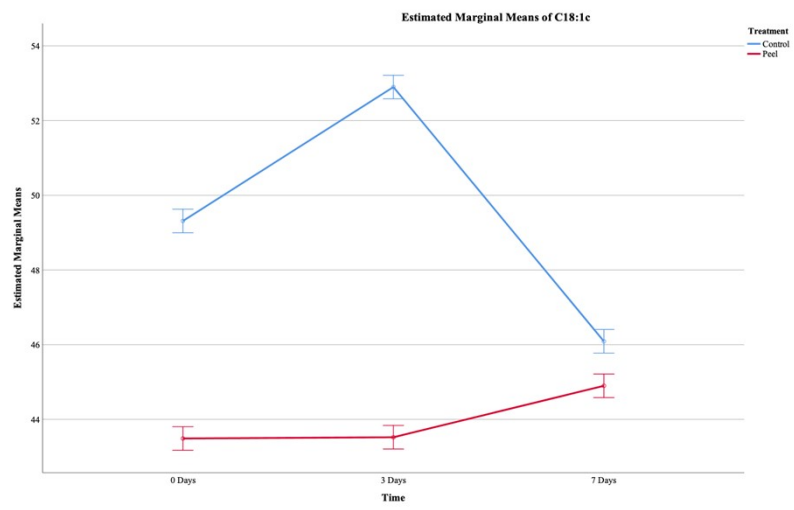

a)

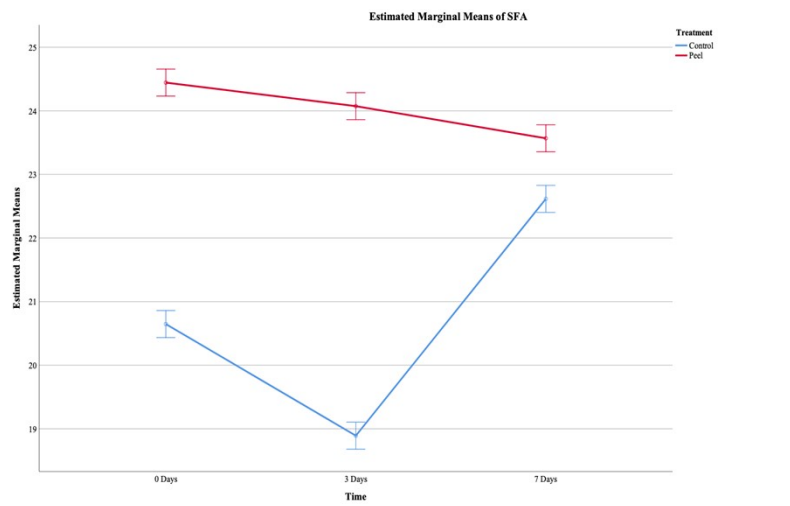

b)

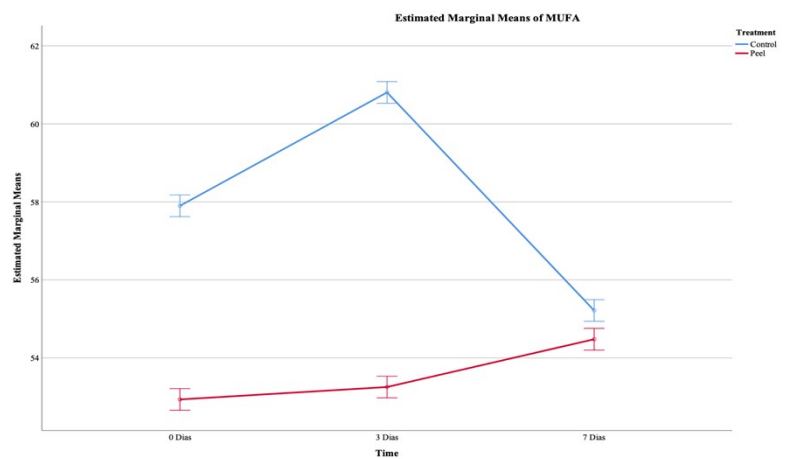

c)

Figure 1: EMM plots of a) C18:1, b) SFA and c) MUFA.
